# Supplementary material for: Indoor Volatile Organic Compounds: Concentration Characteristics and Health Risk Analysis on a University Campus
Source: MDPI journal article supplement (doi:10.3390/ijerph20105829), 2023-05-16
Supplement: s1 [file s1]

## **Supplementary Information**

### **Indoor Volatile Organic Compounds: Concentration Characteristics and Health Risk Analysis on a University Campus**

Shengjia Jin<sup>1</sup>, Lu Zhong<sup>1</sup>, Xueyi Zhang<sup>1</sup>, Xinhe Li<sup>1</sup>, Bowei Li<sup>1,\*</sup>, Xuekun Fang<sup>1,2,\*</sup>

<sup>1</sup> College of Environmental & Resource Sciences, Zhejiang University, Hangzhou,  
Zhejiang 310058, China

<sup>2</sup> Center for Global Change Science, Massachusetts Institute of Technology,  
Cambridge, Massachusetts 02139, United States

\* Corresponding author

Email:

fangxuekun@zju.edu.cn (Xuekun Fang)

libowei@zju.edu.cn (Bowei Li)

## Table

Table S1. Sampling time and the number of samples collected in each place

| Sampling time               | Dormitory | Classroom | Library | Canteen |
|-----------------------------|-----------|-----------|---------|---------|
| January<br>(1.5-1.7)        | 3         | 3         | 1       | 1       |
| April<br>(4.27-4.29)        | 4         | 3         | 1       | 1       |
| July<br>(7.3-7.6&7.12-7.14) | 6         | 6         | 0       | 0       |
| October<br>(10.25-10.28)    | 6         | 6         | 0       | 0       |

Table S2. RfD of species used for calculating non-cancer risk, and the Hazard Quotient (HQ) of each species at the dormitory, classroom, canteen, and library.

| Substance              | RfD<br>(mg/kg/d) | Dormitory |          | Classroom |          | Canteen* | Library* |
|------------------------|------------------|-----------|----------|-----------|----------|----------|----------|
|                        |                  | MEAN      | SD       | MEAN      | SD       | MEAN     | MEAN     |
| Naphthalene            | 0.02             | 2.14E-03  | 9.37E-04 | 1.19E-03  | 9.53E-04 | 1.20E-03 | 1.07E-03 |
| Benzene                | 0.004            | 1.91E-02  | 9.34E-03 | 1.61E-02  | 1.03E-02 | 1.81E-02 | 1.68E-02 |
| Toluene                | 0.08             | 4.17E-03  | 2.36E-03 | 2.35E-03  | 1.80E-03 | 3.46E-03 | 4.23E-03 |
| Ethylbenzene           | 0.1              | 7.89E-04  | 3.49E-04 | 5.33E-04  | 3.72E-04 | 8.75E-04 | 7.58E-04 |
| Styrene                | 0.2              | 1.53E-04  | 7.33E-05 | 5.38E-05  | 4.73E-05 | 7.80E-05 | 8.97E-05 |
| 1,3,5-Trimethylbenzene | 0.04             | 1.32E-04  | 6.66E-05 | 9.00E-05  | 5.60E-05 | 2.04E-04 | 1.61E-04 |
| 1,2,4-Trimethylbenzene | 0.01             | 4.50E-03  | 2.02E-03 | 2.10E-03  | 1.13E-03 | 2.92E-03 | 3.02E-03 |
| 1,2,3-Trimethylbenzene | 0.01             | 7.93E-04  | 4.19E-04 | 4.33E-04  | 2.60E-04 | 4.71E-04 | 4.89E-04 |
| Bromomethane           | 0.0014           | 2.52E-03  | 2.14E-03 | 1.81E-03  | 9.98E-04 | 4.00E-03 | 3.81E-03 |
| Chloroform             | 0.01             | 1.48E-02  | 1.72E-02 | 6.40E-03  | 4.47E-03 | 7.30E-03 | 4.08E-03 |
| 1,1,1-Trichloroethane  | 2                | 9.78E-07  | 7.42E-07 | 7.38E-07  | 7.68E-07 | 1.86E-07 | 1.68E-07 |
| Trichloroethylene      | 0.0005           | 3.30E-02  | 2.24E-02 | 1.77E-02  | 7.11E-03 | 2.71E-02 | 2.74E-02 |
| 1,1,2-Trichloroethane  | 0.004            | 2.21E-03  | 1.03E-03 | 1.27E-03  | 5.94E-04 | 2.73E-03 | 1.59E-03 |
| Tetrachloroethylene    | 0.006            | 4.12E-03  | 2.75E-03 | 2.10E-03  | 1.10E-03 | 2.51E-03 | 2.30E-03 |
| Dibromochloromethane   | 0.02             | 4.08E-04  | 5.42E-04 | 1.69E-05  | 9.94E-06 | 5.78E-05 | 3.03E-05 |
| 1,2-Dibromoethane      | 0.009            | 2.24E-04  | 1.57E-04 | 1.35E-04  | 1.70E-04 | 7.03E-04 | 2.73E-05 |
| Chlorobenzene          | 0.02             | 2.06E-04  | 1.12E-04 | 2.10E-04  | 3.55E-04 | 4.13E-04 | 4.89E-04 |
| Bromoform              | 0.02             | 1.38E-04  | 6.65E-05 | 7.82E-05  | 6.39E-05 | 1.59E-04 | 1.43E-04 |
| 1,2-Dichlorobenzene    | 0.09             | 2.42E-05  | 1.24E-05 | 1.70E-05  | 9.15E-06 | 8.99E-05 | 4.47E-05 |
| tetrahydrofuran        | 0.9              | 4.47E-05  | 3.27E-05 | 3.61E-05  | 4.84E-05 | 1.95E-05 | 1.91E-05 |
| Acrolein               | 0.0005           | 1.15E-01  | 4.82E-02 | 6.79E-02  | 3.68E-02 | 9.99E-02 | 4.87E-02 |
| Acetone                | 0.9              | 2.76E-03  | 1.19E-03 | 1.87E-03  | 1.15E-03 | 1.32E-03 | 8.58E-04 |
| Bromodichloromethane   | 0.02             | 1.50E-03  | 2.22E-03 | 8.15E-05  | 8.30E-05 | 1.11E-04 | 4.25E-05 |
| 2-Hexanone             | 0.005            | 1.97E-03  | 1.51E-03 | 1.53E-03  | 1.57E-03 | 6.20E-04 | 3.68E-04 |

Note:

\* Due to only 2 samples being collected each in the canteen and the library, the results in both places have no SD.

Table S3. SF of species used for calculating lifetime cancer risk, the mean Lifetime Cancer Risk (LCR) and the maximum tolerable concentration (Tconc, mg/m<sup>3</sup>) of each species at the dormitory, classroom, canteen, and library.

| Substance                | SF       | Dormitory |       | Classroom |        | Canteen* |        | Library* |         |
|--------------------------|----------|-----------|-------|-----------|--------|----------|--------|----------|---------|
|                          |          | LCR       | Tconc | LCR       | Tconc  | LCR      | Tconc  | LCR      | Tconc   |
| 1,3-Butadiene            | 3.00E-05 | 6.45E-09  | 0.58  | 4.02E-09  | 1.36   | 6.16E-09 | 7.32   | 9.54E-09 | 17.15   |
| Benzene                  | 7.80E-06 | 3.18E-08  | 2.22  | 2.69E-08  | 5.21   | 3.02E-08 | 28.15  | 2.80E-08 | 65.97   |
| Ethylbenzene             | 2.50E-06 | 1.05E-08  | 6.94  | 7.12E-09  | 16.26  | 1.17E-08 | 87.82  | 1.01E-08 | 205.84  |
| Vinyl chloride           | 4.40E-06 | 1.40E-09  | 3.94  | 1.39E-09  | 9.24   | 2.57E-09 | 49.90  | 1.79E-09 | 116.95  |
| 1,1-Dichloroethane       | 1.60E-06 | 2.60E-09  | 10.85 | 3.26E-09  | 25.41  | 3.27E-09 | 137.23 | 2.73E-09 | 321.62  |
| Chloroform               | 2.30E-05 | 1.82E-07  | 0.75  | 7.87E-08  | 1.77   | 8.97E-08 | 9.55   | 5.02E-08 | 22.37   |
| 1,2-Dichloroethane       | 2.60E-05 | 1.95E-06  | 0.67  | 2.16E-07  | 1.56   | 2.28E-07 | 8.44   | 2.11E-07 | 19.79   |
| Trichloroethylene        | 4.10E-06 | 3.61E-09  | 4.23  | 1.94E-09  | 9.92   | 2.97E-09 | 53.55  | 3.00E-09 | 125.51  |
| 1,2-Dichloropropane      | 3.70E-05 | 1.30E-07  | 0.47  | 4.14E-08  | 1.10   | 8.25E-08 | 5.93   | 5.62E-08 | 13.91   |
| 1,1,2-Trichloroethane    | 1.60E-05 | 7.57E-09  | 1.08  | 4.33E-09  | 2.54   | 9.35E-09 | 13.72  | 5.44E-09 | 32.16   |
| Tetrachloroethylene      | 2.60E-07 | 3.43E-10  | 66.74 | 1.75E-10  | 156.38 | 2.09E-10 | 844.47 | 1.92E-10 | 1979.22 |
| 1,2-Dibromoethane        | 6.00E-04 | 6.45E-08  | 0.03  | 3.88E-08  | 0.07   | 2.03E-07 | 0.37   | 7.87E-09 | 0.86    |
| Bromoform                | 1.10E-06 | 1.63E-10  | 15.77 | 9.19E-11  | 36.96  | 1.87E-10 | 199.60 | 1.68E-10 | 467.82  |
| 1,4-Dichlorobenzene      | 1.10E-05 | 5.21E-08  | 1.58  | 2.62E-08  | 3.70   | 1.42E-08 | 19.96  | 6.28E-09 | 46.78   |
| BenzylChloride           | 4.90E-05 | 4.46E-09  | 0.35  | 4.60E-09  | 0.83   | 1.02E-09 | 4.48   | 9.89E-10 | 10.50   |
| Hexachloro-1,3-butadiene | 2.20E-05 | 4.82E-09  | 0.79  | 4.31E-09  | 1.85   | 3.55E-09 | 9.98   | 2.10E-09 | 23.39   |
| MTBE                     | 2.60E-07 | 5.92E-10  | 66.74 | 3.86E-10  | 156.38 | 3.47E-10 | 844.47 | 2.82E-10 | 1979.22 |
| 1,4-dioxane              | 5.00E-06 | 9.18E-10  | 3.47  | 5.32E-10  | 8.13   | 3.63E-10 | 43.91  | 3.42E-10 | 102.92  |
| Bromodichloromethane     | 3.70E-05 | 5.94E-08  | 0.47  | 3.22E-09  | 1.10   | 4.38E-09 | 5.93   | 1.68E-09 | 13.91   |

Note:

\* Due to only 2 samples being collected each in the canteen and the library, the results at the canteen and library should be treated with caution.

Table S4 The concentration ( $\mu\text{g}/\text{m}^3$ ) of each VOCs detected in this study during the whole sampling period at the dormitory, classroom, canteen, and library.

| Group  | Substance              | Dormitory |      | Classroom |      | Canteen* | Library* |
|--------|------------------------|-----------|------|-----------|------|----------|----------|
|        |                        | Mean      | SD   | Mean      | SD   | Mean     | Mean     |
| Alkane | Ethane                 | 4.23      | 1.99 | 3.33      | 1.83 | 4.91     | 5.50     |
|        | Propane                | 6.48      | 2.77 | 3.50      | 2.42 | 8.31     | 7.93     |
|        | iso-Butane             | 4.65      | 2.76 | 2.24      | 1.66 | 6.23     | 4.75     |
|        | n-Butane               | 5.48      | 2.23 | 2.10      | 1.32 | 3.82     | 3.40     |
|        | iso-Pentane            | 3.67      | 1.76 | 1.97      | 1.37 | 3.22     | 3.62     |
|        | n-Pentane              | 1.76      | 1.09 | 1.05      | 0.81 | 3.52     | 1.73     |
|        | n-Hexane               | 1.57      | 1.28 | 1.03      | 0.73 | 1.50     | 1.33     |
|        | n-Heptane              | 0.90      | 0.54 | 0.73      | 0.60 | 1.14     | 0.56     |
|        | Cyclohexane            | 0.53      | 0.41 | 0.43      | 0.38 | 0.36     | 0.37     |
|        | Cyclopentane           | 0.18      | 0.13 | 0.12      | 0.12 | 0.12     | 0.03     |
|        | 2,3-Dimethylbutane     | 0.58      | 0.69 | 0.30      | 0.25 | 0.77     | 0.37     |
|        | 2,2-Dimethylbutane     | 0.11      | 0.08 | 0.10      | 0.05 | 0.11     | 0.10     |
|        | 2-Methylpentane        | 1.97      | 1.81 | 1.44      | 1.17 | 2.83     | 2.35     |
|        | 3-Methylpentane        | 1.06      | 0.92 | 0.81      | 0.51 | 1.14     | 1.09     |
|        | 2-Methylhexane         | 0.48      | 0.37 | 0.37      | 0.25 | 0.42     | 0.35     |
|        | 3-Methylhexane         | 0.56      | 0.45 | 0.41      | 0.35 | 0.37     | 0.43     |
|        | 2,3-Dimethylpentane    | 0.57      | 0.62 | 0.44      | 0.45 | 0.10     | 0.12     |
|        | 2,4-Dimethylpentane    | 0.34      | 0.13 | 1.44      | 2.40 | 0.28     | 0.29     |
|        | 2-Methylheptane        | 0.14      | 0.10 | 0.10      | 0.05 | 0.08     | 0.10     |
|        | 2,3,4-Trimethylpentane | 0.10      | 0.11 | 0.07      | 0.03 | 0.06     | 0.06     |
|        | 2,2,4-Trimethylpentane | 0.19      | 0.15 | 0.13      | 0.09 | 0.08     | 0.08     |
|        | 3-Methylheptane        | 0.14      | 0.10 | 0.11      | 0.05 | 0.07     | 0.10     |
|        | Methylcyclohexane      | 0.34      | 0.21 | 0.27      | 0.11 | 0.28     | 0.32     |
|        | Methylcyclopentane     | 0.58      | 0.52 | 0.42      | 0.29 | 0.43     | 0.42     |
|        | n-Octane               | 0.59      | 0.40 | 0.28      | 0.18 | 0.62     | 0.27     |
|        | Nonane                 | 0.31      | 0.11 | 0.25      | 0.16 | 0.23     | 0.20     |
|        | n-Decane               | 0.32      | 0.14 | 0.19      | 0.12 | 0.19     | 0.20     |
|        | n-Undecane             | 0.60      | 0.24 | 0.32      | 0.23 | 0.42     | 0.44     |
|        | n-Dodecane             | 1.59      | 0.71 | 0.45      | 0.19 | 0.52     | 0.57     |
| Alkene | Ethylene               | 1.98      | 1.26 | 1.22      | 0.94 | 1.68     | 1.85     |
|        | Propylene              | 0.70      | 0.53 | 0.38      | 0.31 | 0.40     | 0.50     |
|        | 1,3-Butadiene          | 0.09      | 0.05 | 0.05      | 0.04 | 0.08     | 0.13     |
|        | 1-Butene               | 0.15      | 0.15 | 0.07      | 0.05 | 0.14     | 0.22     |
|        | cis-2-Butene           | 0.27      | 0.20 | 0.20      | 0.10 | 0.16     | 0.11     |
|        | trans-2-Butene         | 0.27      | 0.24 | 0.08      | 0.03 | 0.05     | 0.10     |
|        | 1-Pentene              | 0.12      | 0.08 | 0.08      | 0.04 | 0.13     | 0.10     |

|                |                         |       |       |      |      |      |      |
|----------------|-------------------------|-------|-------|------|------|------|------|
|                | cis-2-Pentene           | 0.15  | 0.11  | 0.09 | 0.08 | 0.02 | 0.02 |
|                | Isoprene                | 6.19  | 3.89  | 5.18 | 5.00 | 1.93 | 0.58 |
|                | trans-2-Pentene         | 0.07  | 0.09  | 0.03 | 0.02 | 0.02 | 0.02 |
|                | 1-Hexene                | 0.32  | 0.37  | 0.12 | 0.09 | 0.06 | 0.10 |
| Alkyne         | Acetylene               | 1.10  | 0.78  | 1.03 | 0.93 | 1.27 | 1.31 |
| Aromatic       | Benzene                 | 1.66  | 0.81  | 1.40 | 0.90 | 1.57 | 1.46 |
|                | Ethylbenzene            | 1.71  | 0.76  | 1.16 | 0.81 | 1.90 | 1.65 |
|                | Isopropylbenzene        | 0.12  | 0.05  | 0.11 | 0.04 | 0.12 | 0.11 |
|                | m/p-Xylene              | 3.50  | 1.86  | 2.33 | 1.87 | 3.57 | 3.05 |
|                | m-Diethylbenzene        | 0.25  | 0.20  | 0.05 | 0.03 | 0.06 | 0.03 |
|                | m-Ethyltoluene          | 0.29  | 0.17  | 0.21 | 0.15 | 0.37 | 0.31 |
|                | Naphthalene             | 0.93  | 0.41  | 0.52 | 0.41 | 0.52 | 0.47 |
|                | n-Propylbenzene         | 0.13  | 0.06  | 0.11 | 0.07 | 0.13 | 0.12 |
|                | o-Ethyltoluene          | 0.18  | 0.10  | 0.13 | 0.08 | 0.20 | 0.16 |
|                | o-Xylene                | 1.45  | 0.72  | 1.01 | 0.66 | 1.36 | 1.22 |
|                | p-Diethylbenzene        | 0.18  | 0.11  | 0.09 | 0.07 | 0.10 | 0.09 |
|                | p-Ethyltoluene          | 0.13  | 0.06  | 0.10 | 0.06 | 0.20 | 0.17 |
|                | Styrene                 | 0.66  | 0.32  | 0.23 | 0.21 | 0.34 | 0.39 |
|                | Toluene                 | 7.25  | 4.09  | 4.08 | 3.13 | 6.01 | 7.34 |
|                | 1,2,3-Trimethylbenzene  | 0.17  | 0.09  | 0.09 | 0.06 | 0.10 | 0.11 |
|                | 1,2,4-Trichlorobenzene  | 0.13  | 0.14  | 0.07 | 0.06 | 0.38 | 0.04 |
|                | 1,2,4-Trimethylbenzene  | 0.98  | 0.44  | 0.46 | 0.24 | 0.63 | 0.66 |
|                | 1,3,5-Trimethylbenzene  | 0.11  | 0.06  | 0.08 | 0.05 | 0.18 | 0.14 |
| Halocarbo<br>n | 1,1,1-Trichloroethane   | 0.04  | 0.03  | 0.03 | 0.03 | 0.01 | 0.01 |
|                | 1,1,2,2-trachloroethane | 0.02  | 0.01  | 0.02 | 0.01 | 0.03 | 0.00 |
|                | 1,1,2-Trichloroethane   | 0.19  | 0.09  | 0.11 | 0.05 | 0.24 | 0.14 |
|                | 1,1-Dichloroethane      | 0.66  | 0.28  | 0.83 | 0.21 | 0.83 | 0.69 |
|                | 1,1-Dichloroethene      | 0.24  | 0.07  | 0.28 | 0.08 | 0.22 | 0.20 |
|                | 1,2-Dibromoethane       | 0.04  | 0.03  | 0.03 | 0.03 | 0.14 | 0.01 |
|                | 1,2-Dichlorobenzene     | 0.05  | 0.02  | 0.03 | 0.02 | 0.18 | 0.09 |
|                | 1,2-Dichloroethane      | 30.53 | 27.56 | 3.38 | 1.70 | 3.57 | 3.30 |
|                | 1,2-Dichloropropane     | 1.43  | 1.31  | 0.45 | 0.26 | 0.91 | 0.62 |
|                | 1,3-Dichlorobenzene     | 0.44  | 1.00  | 0.16 | 0.50 | 0.21 | 0.02 |
|                | 1,4-Dichlorobenzene     | 1.93  | 1.05  | 0.97 | 1.01 | 0.52 | 0.23 |
|                | BenzylChloride          | 0.04  | 0.03  | 0.04 | 0.05 | 0.01 | 0.01 |
|                | Bromoform               | 0.06  | 0.03  | 0.03 | 0.03 | 0.07 | 0.06 |
|                | Bromomethane            | 0.08  | 0.07  | 0.05 | 0.03 | 0.12 | 0.12 |
|                | CarbonTetrachloride     | 0.70  | 0.16  | 0.61 | 0.09 | 0.58 | 0.56 |
|                | Chlorobenzene           | 0.09  | 0.05  | 0.09 | 0.15 | 0.18 | 0.21 |

|      |                           |       |       |       |       |       |       |
|------|---------------------------|-------|-------|-------|-------|-------|-------|
|      | Chloroethane              | 0.22  | 0.28  | 0.19  | 0.30  | 0.99  | 0.92  |
|      | Chloroform                | 3.22  | 3.73  | 1.39  | 0.97  | 1.59  | 0.89  |
|      | Chloromethane             | 2.18  | 0.86  | 2.18  | 1.33  | 2.13  | 2.07  |
|      | cis-1,2-Dichloroethene    | 0.04  | 0.02  | 0.04  | 0.02  | 0.04  | 0.02  |
|      | cis-1,3-Dichloropropene   | 0.02  | 0.01  | 0.02  | 0.02  | 0.01  | 0.00  |
|      | Dibromochloromethane      | 0.18  | 0.24  | 0.01  | 0.00  | 0.03  | 0.01  |
|      | Freon-11                  | 1.41  | 0.27  | 1.52  | 0.17  | 1.73  | 1.81  |
|      | Freon-113                 | 0.73  | 0.12  | 0.75  | 0.33  | 0.61  | 0.61  |
|      | Freon-114                 | 0.14  | 0.09  | 0.11  | 0.09  | 0.15  | 0.19  |
|      | Freon-12                  | 1.30  | 1.08  | 1.45  | 0.83  | 2.32  | 0.86  |
|      | Hexachloro-1,3-butadiene  | 0.09  | 0.05  | 0.08  | 0.06  | 0.07  | 0.04  |
|      | MethyleneChloride         | 9.07  | 4.85  | 7.54  | 4.84  | 11.20 | 10.73 |
|      | Tetrachloroethylene       | 0.54  | 0.36  | 0.27  | 0.14  | 0.33  | 0.30  |
|      | Trans-1,2-Dichloroethene  | 0.03  | 0.01  | 0.03  | 0.01  | 0.04  | 0.03  |
|      | trans-1,3-Dichloropropene | 0.10  | 0.05  | 0.07  | 0.04  | 0.05  | 0.04  |
|      | Trichloroethylene         | 0.36  | 0.24  | 0.19  | 0.08  | 0.29  | 0.30  |
|      | Vinyl chloride            | 0.13  | 0.08  | 0.13  | 0.06  | 0.24  | 0.16  |
| OVOC | 1,4-dioxane               | 0.07  | 0.04  | 0.04  | 0.03  | 0.03  | 0.03  |
|      | 2-Hexanone                | 0.21  | 0.16  | 0.17  | 0.17  | 0.07  | 0.04  |
|      | 2-Pentanone               | 0.41  | 0.22  | 0.26  | 0.08  | 0.25  | 0.17  |
|      | 2-propnol                 | 10.72 | 20.61 | 9.88  | 31.96 | 5.19  | 7.10  |
|      | 3-Pentanone               | 0.31  | 0.14  | 0.22  | 0.10  | 0.20  | 0.12  |
|      | 4-methyl-2-pentanone      | 1.04  | 0.92  | 0.86  | 0.50  | 0.88  | 0.94  |
|      | Acetaldehyde              | 20.74 | 17.19 | 8.95  | 5.81  | 16.45 | 5.23  |
|      | Acetone                   | 54.02 | 23.18 | 36.58 | 22.49 | 25.79 | 16.77 |
|      | Acrolein                  | 1.25  | 0.52  | 0.74  | 0.40  | 1.08  | 0.53  |
|      | Bromodichloromethane      | 0.65  | 0.96  | 0.04  | 0.04  | 0.05  | 0.02  |
|      | Ethylacetate              | 13.79 | 11.10 | 5.72  | 4.87  | 7.74  | 8.52  |
|      | Hexanal                   | 6.49  | 3.10  | 2.41  | 1.17  | 13.09 | 2.27  |
|      | Methacrolein              | 0.65  | 0.45  | 1.53  | 1.98  | 0.22  | 0.03  |
|      | Methyl Ethyl Ketone       | 3.44  | 1.23  | 3.04  | 1.19  | 3.32  | 5.42  |
|      | Methyl vinyl ketone       | 1.56  | 1.00  | 4.52  | 5.84  | 0.48  | 0.34  |
|      | Methyl methacrylate       | 0.08  | 0.04  | 0.06  | 0.08  | 0.04  | 0.08  |
|      | MTBE                      | 0.93  | 0.69  | 0.60  | 0.46  | 0.54  | 0.44  |
|      | n-Butanal                 | 2.09  | 0.66  | 2.08  | 1.30  | 1.68  | 1.55  |
|      | Pentanal                  | 1.23  | 0.57  | 0.78  | 0.40  | 1.68  | 0.46  |
|      | Propanal                  | 1.94  | 0.59  | 1.78  | 0.67  | 5.11  | 1.54  |

|       |                 |        |        |        |       |        |        |
|-------|-----------------|--------|--------|--------|-------|--------|--------|
|       | Vinyl acetate   | 1.57   | 1.08   | 0.98   | 0.70  | 1.42   | 1.25   |
| Other | Acetonitrile    | 1.60   | 1.52   | 1.10   | 0.67  | 1.73   | 0.58   |
|       | Carbondisulfide | 1.14   | 0.69   | 2.71   | 6.15  | 0.68   | 0.77   |
|       | Tetrahydrofuran | 0.87   | 0.64   | 0.71   | 0.95  | 0.38   | 0.37   |
| TVOC  |                 | 254.27 | 100.77 | 154.03 | 67.52 | 183.57 | 139.41 |

Note:

\* Due to only 2 samples being collected each in the canteen and the library, the results in both places have no SD.



**Figure**

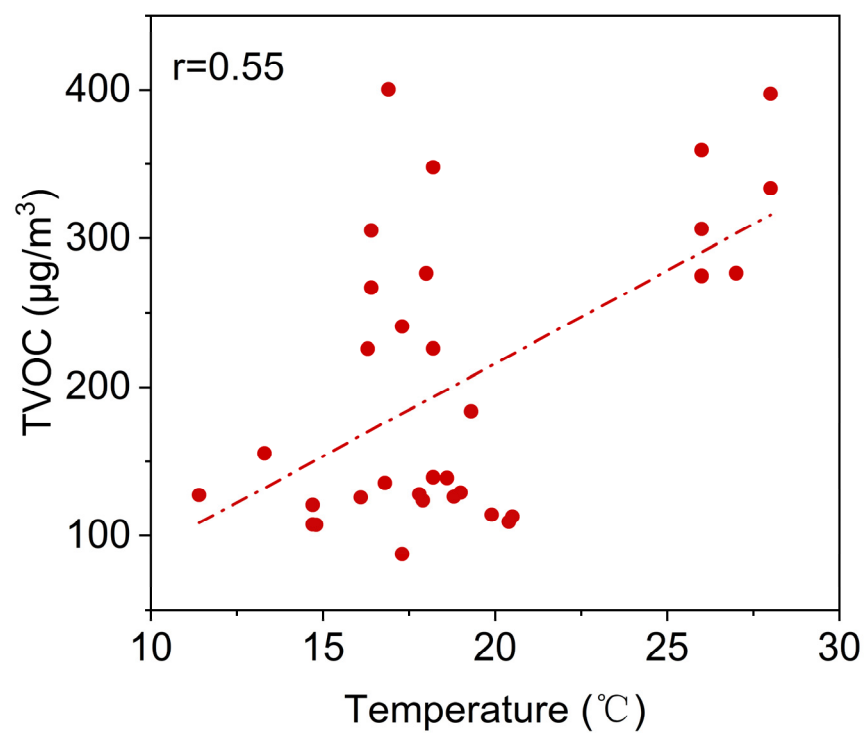

Figure S1 Relationship between temperature and the concentration level of TVOC during the whole sampling campaign.
